# Supplementary material for: Mining hydroformylation in complex reaction network via graph theory
Source: RSC Adv. 2021 Jul 1;11(38):23235–40. doi: 10.1039/d1ra03395f (PMC9036754; doi:10.1039/d1ra03395f)
Supplement: RA-011-D1RA03395F-s001 [file RA-011-D1RA03395F-s001.csv]

Source_Node	Target_node	Activation_Energy_kJ_per_mol
6	117	42.998316048
117	6	42.7859947008
29	118	22.0852153152
118	29	22.171011552
84	119	1.6019347968
119	84	0.963067968
54	32	39.5123959008
32	54	37.6106610528
0	120	19.2478506336
120	0	18.9061654176
84	121	42.4755988128
121	84	39.7007290656
87	122	2.4675964416
122	87	1.3418755488
105	123	183.5015689728
123	105	26.5562590176
78	124	4.1896730304
124	78	3.906413568
84	125	43.1800603488
125	84	40.3624505952
6	9	3.902532048
9	6	3.3995990304
29	9	28.8765422496
9	29	29.2636494144
0	126	4.4424824544
126	0	4.425458976
29	127	11.6610899616
127	29	11.6694991872
18	128	10.2178213344
128	18	3.7942585056
54	9	23.6790581472
9	54	25.055568
101	78	5.3787170016
78	101	6.6063239712
32	54	3.0401915328
54	32	4.9419263808
100	129	36.6544268928
129	100	32.136000912
100	130	33.0592358016
130	100	26.9029496448
130	131	27.6044946624
131	130	29.2320386784
15	16	-0.2627914752
16	15	0.031002336
42	132	1.4197114944
132	42	0.8315104896
32	133	0.7918671456
133	32	-0.2764567584
133	32	0.2665143648
32	133	1.334838528
22	134	7.201004976
134	22	3.9942699264
65	9	23.376064752
9	65	23.4678096288
102	51	0.9856595808
51	102	1.3076142336
89	135	189.351940032
135	89	33.2534922048
32	136	0.3108388608
136	32	-1.8277026624
136	137	-1.5836935968
137	136	-0.7198188768
29	9	6.189491232
9	29	6.5765983968
27	138	169.4808448128
138	27	27.1419263424
9	139	7.5920325408
139	9	7.2069022944
100	140	129.1677534144
140	100	72.0722212128
74	66	2.6876419488
66	74	3.8140971552
66	141	3.7233473472
141	66	2.799188928
101	78	3.1459645728
78	101	4.3735715424
91	142	20.576523312
142	91	20.9550566592
6	54	15.5112980832
54	6	13.631855472
55	143	195.639380352
143	55	116.7621456672
59	42	1.3366099008
42	59	17.0430785856
50	144	11.0625974208
144	50	11.6141918688
26	145	54.2419760736
145	26	169.565094144
64	50	1.7842897728
50	64	1.021316688
31	146	1.142263296
146	31	1.9400402016
146	51	2.4099993504
51	146	18.593364672
115	147	6.9129267264
147	115	6.690138624
147	9	4.7240970336
9	147	4.8891685536
79	9	30.7017368928
9	79	35.2078223616
107	41	1.5528070656
41	107	2.9651025888
40	17	0.5978852352
17	40	1.3848153984
28	45	-0.9458347968
45	28	14.4606873888
22	148	183.468795984
148	22	23.4597910176
18	149	17.5085333568
149	18	16.4320324704
149	29	3.7534697568
29	149	3.714981408
18	150	9.3720312576
150	18	8.125100928
6	151	34.1198368416
151	6	29.039898384
151	152	-0.912574512
152	151	-0.535433328
152	32	0.8006356224
32	152	1.7222551776
14	153	4.4139292416
153	14	1.4772142368
1	154	9.2086909344
154	1	6.2356739328
154	140	5.2990041888
140	154	4.1855450112
115	155	32.8772735136
155	115	33.1573121568
5	35	7.7816490048
35	5	7.1231350752
6	9	0.4036788576
9	6	-0.0992542752
9	156	0.3322402272
156	9	0.1229556096
63	157	4.1278761216
157	63	1.1335038912
54	158	9.3670585056
158	54	10.5477712704
158	6	7.2146191968
6	158	7.9133490432
79	159	-1.087281792
159	79	-0.9173414592
159	32	-0.9858278016
32	159	0.0720728736
32	54	3.9309901344
54	32	5.8327249824
36	160	28.8070553952
160	36	29.6905868064
83	161	4.2978942144
161	83	2.8184096448
78	162	57.7614768768
162	78	39.8790273024
11	163	4.4260113312
163	11	59.850056304
163	164	25.012150704
164	163	130.3136659872
32	165	1.7139252672
165	32	0.3669030432
165	166	0.2145607776
166	165	4.44073752
87	167	34.179931584
167	87	72.7832700576
69	34	16.639329744
34	69	15.8277652128
4	57	11.1480305184
57	4	9.4994096544
39	168	17.6539489632
168	39	19.5664095072
168	169	207.37515672
169	168	196.5720851136
56	23	6.7484671776
23	56	3.994824096
66	98	3.6605120832
98	66	4.145694048
98	17	1.4067805248
17	98	-0.2249946432
17	83	1.2661761888
83	17	1.457997408
28	170	189.6746849856
170	28	47.6564026176
54	171	31.0077193824
171	54	32.2038304416
23	172	168.1340333184
172	23	199.1311280928
79	84	6.290172288
84	79	8.1204902784
84	6	3.0700933632
6	84	6.2487938592
52	123	190.1684153664
123	52	35.20012464
59	173	199.7242386048
173	59	58.5503603712
111	174	61.234689744
174	111	41.7395887488
93	175	203.8276488384
175	93	259.017345648
84	176	1.4384726496
176	84	-1.3469162112
176	177	42.626795616
177	176	43.9288922592
177	32	1.5113910528
32	177	2.3922065664
32	54	2.8421129664
54	32	4.7438475552
0	178	7.8917346144
178	0	2.6158163328
178	152	-2.8675433376
152	178	-1.5411355488
64	50	1.696563792
50	64	0.9335907072
18	179	11.0566187136
179	18	11.1470403744
179	18	11.2426991712
18	179	11.1522775104
18	29	8.1617222592
29	18	7.046733024
29	180	3.3825278592
180	29	3.3335315424
24	175	202.3451502912
175	24	254.8606871808
79	84	-2.5890238656
84	79	-0.7587058752
84	181	1.7765189568
181	84	1.7949931776
181	182	2.8505976192
182	181	5.5958967936
9	54	1.3870338912
54	9	0.0105240672
34	36	67.2739274016
36	34	68.716094688
107	50	1.455662016
50	107	1.2636876096
16	91	5.1698212416
91	16	3.5331023232
91	183	0.288830448
183	91	0.0571977984
42	51	4.8023243712
51	42	5.33350008
1	141	24.6511714176
141	1	23.6354308992
116	25	1.4026885344
25	116	67.5979535808
25	54	63.4455923904
54	25	117.4411734624
54	184	136.5526289088
184	54	101.6619579648
124	78	3.8732984352
78	124	4.1565576384
115	185	54.0272633472
185	115	53.8062372864
100	186	55.9638388224
186	100	55.1115506016
186	9	5.2458290496
9	186	5.7365913312
9	54	1.3993943616
54	9	0.022884624
49	104	6.3745177824
104	49	5.8609728576
48	90	6.6148148448
90	48	3.6682274304
3	114	9.1817406144
114	3	9.6521652864
100	187	16.203922992
187	100	11.4429005856
187	188	3.1117392864
188	187	2.4071064192
188	189	2.0011699296
189	188	1.82603808
79	32	4.959394128
32	79	6.1872351552
32	190	3.8611800576
190	32	1.7865989856
190	191	0.006923088
191	190	-0.0257124384
104	192	220.3372710144
192	104	292.7494293984
45	193	220.0881074976
193	45	30.58451784
101	194	48.796044624
194	101	87.2804206656
194	195	63.3648308544
195	194	7.2933265728
46	196	196.46416512
196	46	273.3222880512
196	173	234.5370028416
173	196	16.3957483584
21	197	19.6432371648
197	21	18.3445925472
120	198	-0.0769090944
198	120	0.3457245888
198	199	5.3615398176
199	198	5.29702416
90	200	199.009034784
200	90	193.7224931904
31	157	3.3266526336
157	31	19.1762155296
72	201	114.899461632
201	72	277.7769078048
97	202	6.3044396928
202	97	23.0240843712
202	11	24.5377512
11	202	6.6317634144
56	23	8.2375170048
23	56	5.4838739232
75	99	6.233452848
99	75	3.6436296096
98	203	192.8139632352
203	98	186.7021011072
74	204	2.6083099008
204	74	3.9418373952
16	63	5.1618399552
63	16	6.3871123104
157	17	-1.1562554304
17	157	0.1284263616
50	205	75.8220997536
205	50	9.206747712
124	206	0.7110654336
206	124	0.0288639552
206	78	3.4107145632
78	206	4.3761754656
88	35	5.1482386944
35	88	20.1936131136
35	25	4.8987573984
25	35	4.3964379072
16	207	191.6819269344
207	16	195.3799602912
207	208	12.6260335008
208	207	4.1859431424
167	209	198.9896730624
209	167	13.9049934336
85	16	4.1237066304
16	85	3.1763671776
16	4	2.0809514304
4	16	1.7802343296
71	210	13.0352654592
210	71	-1.9406366208
0	152	22.2875572032
152	0	18.3380467104
2	197	2.4085016928
197	2	-0.8301872736
197	21	1.3152606336
21	197	2.6139052512
135	148	5.8537238112
148	135	3.6150600672
148	211	4.636700496
211	148	-0.5385465792
211	212	4.0897493568
212	211	5.475961584
32	54	44.2156706208
54	32	46.1174054688
25	41	12.1648189824
41	25	13.8532423392
41	83	13.500565488
83	41	13.4903488608
114	213	225.5841583776
213	114	47.0599613856
213	214	4.9337097408
214	213	2.320175664
10	215	202.2427027872
215	10	209.0627368992
160	216	169.4049360192
216	160	94.015830384
57	4	5.3665436736
4	57	7.0151647968
4	217	194.018683104
217	4	177.752263104
17	218	193.214511216
218	17	188.72411616
78	219	16.8843880512
219	78	1.3837938912
42	50	6.7944759552
50	42	6.0765220224
36	220	208.4903105472
220	36	197.3061576576
41	31	20.299087296
31	41	2.96280504
31	221	1.6332145344
221	31	17.5908358368
153	222	1.6957670112
222	153	21.4294940064
12	223	5.3905334112
223	12	7.6573346112
5	224	6.5925819648
224	5	7.7519026944
224	225	197.5094741376
225	224	40.9040572896
79	152	6.1806885408
152	79	6.4869097536
123	226	8.3638352736
226	123	157.2925980384
226	227	38.3622288192
227	226	33.9087687264
227	228	32.0574000672
228	227	22.6676110176
164	229	14.2383715488
229	164	17.5859400672
181	84	0.0230639136
84	181	0.0045897408
84	230	36.1615775328
230	84	33.5835297504
29	231	3.5533069632
231	29	3.5162118144
16	63	5.420277648
63	16	6.6455500032
51	17	23.990537232
17	51	24.1436396736
34	232	209.5592930784
232	34	202.193551728
54	9	3.2690905344
9	54	4.645600128
96	233	2.053942272
233	96	1.7727846624
233	234	-0.0099234144
234	233	7.7029849152
234	13	5.5485717984
13	234	5.9523678144
148	235	4.523939424
235	148	-0.759433968
235	225	0.1308169824
225	235	7.5631244832
75	99	8.961409728
99	75	6.3715864896
63	52	3.8496002976
52	63	1.7864515008
132	17	2.0809299168
17	132	3.353409072
17	236	20.0900536416
236	17	18.7269962688
73	23	4.8180051936
23	73	4.934171376
64	31	17.391564432
31	64	0.8965790208
14	46	3.4033794624
46	14	2.6326376352
46	132	-0.8346527712
132	46	14.1743615904
38	237	171.6052135392
237	38	236.5427660544
168	238	4.071849264
238	168	2.1593817216
238	239	2.3262005088
239	238	3.432014064
140	16	2.545275312
16	140	5.8779945216
16	240	-0.9401515776
240	16	1.4810931648
240	63	2.511270864
63	240	1.3152984768
85	241	3.5210054592
241	85	2.5148548224
8	17	1.6521890112
17	8	4.2024725856
91	25	18.779820192
25	91	18.4457354976
25	242	-2.6323582176
242	25	-3.6055539072
40	17	0.9757161504
17	40	1.7626463136
17	243	61.6208790816
243	17	61.845060384
141	208	194.8311970848
208	141	190.3511233728
77	213	223.8130572192
213	77	46.6981806528
48	244	36.4137558048
244	48	16.7686184448
154	240	3.3951617856
240	154	8.03566656
240	63	9.1356330816
63	240	7.9396606944
138	192	2.5083027648
192	138	182.1225873888
192	245	40.4059365792
245	192	10.5151294368
169	200	87.7800841344
200	169	91.7991483552
200	246	85.1355974304
246	200	37.7918270784
246	247	136.1306702304
247	246	208.9357543008
53	34	6.6015484704
34	53	5.2924070304
124	219	21.794640192
219	124	6.5773052352
84	128	1.8842544
128	84	-1.1356583616
128	54	29.6794129536
54	128	33.9985836
195	16	2.303466336
16	195	20.7885149568
88	183	61.0836717888
183	88	75.7291786272
13	90	1.7045010144
90	13	1.0713726144
184	248	-1.0921791168
248	184	34.959701088
248	54	36.2396223936
54	248	35.0784131328
164	229	3.9727617696
229	164	7.320330288
102	17	16.8312554208
17	102	17.306312256
111	249	30.4038681408
249	111	30.4559282016
78	23	69.190730064
23	78	17.8639735392
75	99	6.7422515616
99	75	4.1524283232
115	250	50.9376086784
250	115	50.5297719936
210	183	10.656537552
183	210	25.0475913792
21	251	34.1508369024
251	21	20.5777034496
251	252	7.1483865984
252	251	4.1242913856
97	174	1.2853362528
174	97	-1.3684044096
174	91	2.5391988864
91	174	19.602536544
35	42	5.5923830784
42	35	5.8921709472
42	253	6.0764530752
253	42	3.3462326016
157	254	20.7286068384
254	157	20.1770548992
162	255	1.2035462112
255	162	1.3932321408
255	63	66.5186458176
63	255	85.1069952288
107	256	21.7971860544
256	107	22.7504461536
256	223	6.8028377472
223	256	6.5926814976
223	41	2.274513696
41	223	2.9437053696
3	72	56.971036368
72	3	58.7959710336
72	233	8.417955456
233	72	1.3128516288
174	257	6.9844241952
257	174	6.3580272192
257	258	0.8845130016
258	257	4.8287674368
198	259	107.3098233216
259	198	107.2728370368
42	225	191.0494908576
225	42	35.9621208
194	260	4.2483867552
260	194	4.3058843136
152	32	-0.3754480896
32	152	0.5461714656
32	261	2.9363285376
261	32	4.1039612928
1	154	9.9897434784
154	1	7.0167264768
154	16	6.413358384
16	154	8.632618416
16	71	8.5020277536
71	16	7.2185245632
29	262	93.9664146816
262	29	94.0541917248
99	175	190.9689750432
175	99	244.1722672512
213	175	100.2233108736
175	213	332.1573114528
48	90	6.502619088
90	48	3.5560316736
40	51	19.4884828416
51	40	20.1223105632
124	135	192.3171787008
135	124	36.1044148608
79	263	9.8311413312
263	79	8.8139345184
49	264	157.7971220256
264	49	285.901962336
56	238	56.8516584384
238	56	53.5418144064
74	265	2.6957917152
265	74	3.9525581664
146	35	10.2956940864
35	146	25.6480958304
35	266	6.1629753312
266	35	4.2724568448
193	267	23.7043355904
267	193	114.3016875936
83	268	193.7409119424
268	83	186.3854170272
183	35	3.8235584736
35	183	4.2234260544
214	269	87.1444246464
269	214	252.3564662976
223	173	195.3107453376
173	223	38.2132738368
197	270	32.5008075456
270	197	18.7131091104
270	271	5.52775104
271	270	3.9462645312
148	272	4.9130253216
272	148	4.1401246176
272	173	2.6361018432
173	272	3.7649598336
226	273	15.0273929376
273	226	35.8126728192
220	274	203.8989806784
274	220	64.7652189888
16	91	9.755332848
91	16	8.1186139296
219	111	-0.292102848
111	219	15.6738491424
54	275	34.541830512
275	54	31.0026019968
184	276	33.834533328
276	184	70.395949152
276	100	3.9349128672
100	276	4.0022032608
8	277	1.7800635168
277	8	3.0519268128
229	278	8.4681140256
278	229	8.5516814016
135	226	7.6331504736
226	135	156.9220825248
226	192	69.7135802688
192	226	97.024718592
192	279	100.1055454272
279	192	27.5999949504
13	90	4.9270501152
90	13	4.293921456
234	13	1.1524508928
13	234	1.556247168
13	73	0.7380559296
73	13	0.129960288
179	280	19.4486368032
280	179	18.1030194432
84	281	2.8638406656
281	84	5.7645372384
173	225	11.2834052352
225	173	13.076382096
63	36	68.4658171296
36	63	15.2081058816
36	282	4.5787091616
282	36	5.0446289376
195	91	0.7853347872
91	195	17.6336644896
51	268	194.3401240224
268	51	187.3295522496
164	229	11.497926672
229	164	14.8454951904
41	283	30.2382100512
283	41	28.4160257568
111	219	16.6642650432
219	111	0.6983130528
201	284	14.0358645504
284	201	90.734634432
284	285	33.560757216
285	284	18.5863190976
285	286	11.1368758464
286	285	12.266777376
192	287	52.2955745856
287	192	32.2660205568
287	288	70.8194770272
288	287	44.3335845888
4	71	1.2348643104
71	4	0.2520778464
71	183	4.2322730688
183	71	3.6474250752
200	289	166.2872571648
289	200	1.7889924384
289	290	2.9900433312
290	289	14.1308574624
290	291	13.9262390208
291	290	14.8863197088
215	232	15.667152192
232	215	14.9082972768
232	292	-1.4064573024
292	232	0.8513185536
208	207	65.1409597152
207	208	73.5810500736
14	157	3.8436734304
157	14	18.0697438656
197	293	31.3879403808
293	197	19.1508193728
198	294	0.4012685568
294	198	0.3341412
205	35	1.6394954688
35	205	68.6730135744
25	35	5.104009584
35	25	5.6063290752
207	295	7.4027126016
295	207	7.768313424
295	296	9.4847036832
296	295	4.9325101632
170	273	1.3852391904
273	170	173.8031953248
140	297	3.6072107136
297	140	6.117127776
297	157	3.0917080512
157	297	2.1454105824
85	105	1.2209631552
105	85	1.4127667488
146	35	160.4934863136
35	146	175.8458877984
120	298	174.2348346048
298	120	195.1775707104
246	299	10.4733295488
299	246	6.6523182336
12	300	5.3349557472
300	12	2.9813409504
300	35	1.3469123232
35	300	5.4504156096
175	301	106.1665595136
301	175	84.339405792
42	302	76.8416766912
302	42	130.8692552256
255	162	5.8796930592
162	255	5.6900071296
258	303	183.8293566624
303	258	33.6311180928
183	266	31.9763267136
266	183	30.485675808
88	304	29.4376584096
304	88	6.25432104
304	63	3.9210819552
63	304	44.84355048
63	240	3.9568165632
240	63	5.1527889504
240	63	0.2293964832
63	240	-0.9665759808
16	52	5.0388969888
52	16	4.2010208064
102	305	193.9327075008
305	102	187.1786667456
153	146	2.140753536
146	153	4.2517529856
146	306	159.6054458592
306	146	97.0568142912
2	21	5.9082885216
21	2	3.9682441728
239	307	178.7281775424
307	239	21.7362043296
71	91	4.2919914528
91	71	3.938775984
21	308	23.2751519712
308	21	7.9823001312
32	54	0.69804504
54	32	2.599779888
260	267	189.3718507392
267	260	51.7363837632
194	309	0.7261192512
309	194	0.5604134688
194	310	3.2472721152
310	194	2.0489485248
261	54	-0.3218916672
54	261	0.4122104256
252	244	2.3833989504
244	252	3.1127128416
243	311	3.8024608896
311	243	2.8477414944
25	312	9.9239341536
312	25	8.3530494432
204	222	5.608892304
222	204	5.5414868256
222	140	8.7547493088
140	222	4.62018816
256	313	191.3798272608
313	256	10.1664468576
96	234	2.4392477376
234	96	9.870998256
234	90	6.0629417568
90	234	5.8336091136
168	238	5.7511013472
238	168	3.8386338048
152	314	-0.8688749472
314	152	-2.0939140224
210	4	5.1057869184
4	210	21.064475088
157	207	194.8877034624
207	157	200.3548364352
207	148	169.2835223328
148	207	7.1804885184
16	52	2.8779398496
52	16	2.0400636672
163	315	16.1141247072
315	163	6.7403143008
315	316	9.3204040608
316	315	121.7869312896
316	317	124.8062367456
317	316	124.2748308672
317	318	116.6726498688
318	317	14.9170665312
174	195	1.6971970176
195	174	1.912205232
225	295	3.5107167744
295	225	163.830417264
295	319	19.7623325664
319	295	21.836535984
237	287	63.1434118464
287	237	55.0735902432
287	320	51.3301758912
320	287	16.4166168096
233	96	0.2032870368
96	233	0.4844445408
75	321	52.418634192
321	75	0.6194454912
321	322	1.1502145152
322	321	48.7588877856
322	233	7.7304030912
233	322	3.3739898112
107	323	37.4638937184
323	107	77.0542196544
323	324	58.4997984864
324	323	3.0322377216
219	78	-0.3604274496
78	219	15.1401669696
78	111	26.4050378496
111	78	26.8703954208
111	124	5.6862526176
124	111	4.937635584
74	325	193.81317768
325	74	3.635005248
3	77	0.3075436512
77	3	-0.6313521024
77	213	222.5924100288
213	77	45.4775334624
249	326	55.5949420128
326	249	34.2474137856
326	327	2.2489583904
327	326	2.7968812704
164	328	55.4296641696
328	164	16.6199942016
242	12	13.1309491392
12	242	12.8565755712
12	83	13.7735093088
83	12	16.6992850368
91	34	66.6345349152
34	91	14.7966479136
53	36	67.6703618784
36	53	67.8033877248
254	35	4.1904615168
35	254	5.0426289504
212	329	0.2864595456
329	212	2.4628357152
329	319	15.3519097824
319	329	181.507406256
229	278	8.342506224
278	229	8.4260733408
278	330	11.0340734976
330	278	1.9597648032
300	25	25.1765278272
25	300	28.7777118816
172	331	10.006042752
331	172	11.4129536544
299	332	151.4219101056
332	299	123.2342271072
140	57	0.5301308736
57	140	1.9135121184
270	333	7.616835648
333	270	7.1153849952
56	334	3.053074032
334	56	-1.6830343296
334	73	2.8565558496
73	334	4.7228552064
73	90	2.9751004512
90	73	2.9500674336
244	335	1.79198568
335	244	3.318431328
335	336	2.842156512
336	335	4.1926789728
296	337	49.627908144
337	296	53.3358356832
337	338	163.4671749024
338	337	41.949800208
146	339	4.656695184
339	146	19.3803287904
251	270	3.532618656
270	251	2.0194093152
195	174	3.2423895648
174	195	3.0273816096
174	195	14.27448744
195	174	14.4894953952
35	309	37.5802322688
309	35	76.4694662688
278	340	179.5194894816
340	278	26.1561213504
197	21	2.0999155392
21	197	3.3985598976
198	341	201.0807174816
341	198	280.1685254688
181	342	1.5594192576
342	181	-1.048356432
342	54	32.48194608
54	342	36.3705054336
97	183	58.7946545568
183	97	72.9726190272
261	54	-0.1890650784
54	261	0.5450369472
54	343	17.5943435904
343	54	18.7835775552
246	344	149.9811658272
344	246	101.9262914208
8	345	7.022987712
345	8	8.0225738496
345	50	7.1950918464
50	345	7.3435572
50	346	3.047677488
346	50	2.9707645536
164	328	56.8916934336
328	164	18.0820237248
252	347	1.1089926432
347	252	1.1148210144
347	348	2.8667639232
348	347	3.505685184
183	91	4.0713583392
91	183	4.3029911232
307	349	85.0328401824
349	307	138.6442355328
204	350	4.7439258336
350	204	2.8643639904
245	192	0.4296170016
192	245	30.320424144
192	351	80.8286682816
351	192	120.5209054368
84	181	0.2863079136
181	84	0.3047818752
181	9	11.9939431968
9	181	14.6512367136
152	352	2.1938944608
352	152	1.0984009536
197	21	1.0631391264
21	197	2.361783744
194	309	1.466096112
309	194	1.3003905888
217	273	13.261018032
273	217	43.7360308704
273	353	75.8239512192
353	273	97.3688690592
353	354	109.3056291072
354	353	130.4295778944
273	355	52.6545782496
355	273	28.9971817056
355	356	45.4273121664
356	355	19.1894220288
356	357	18.427510368
357	356	17.2320356448
293	358	67.8586178016
358	293	10.1803169088
358	359	95.2743155904
359	358	232.0400123424
54	9	41.2224041376
9	54	42.5989137312
31	360	15.948761328
360	31	70.3896653664
203	361	8.030198736
361	203	9.2356124832
361	362	10.21606992
362	361	5.7936775392
362	208	3.148065648
208	362	6.5874920544
232	363	17.5654764864
363	232	3.8879629344
363	364	100.718890128
364	363	26.7997141728
41	365	2.49277176
365	41	0.503078688
365	41	74.3354902944
41	365	76.3251831072
315	366	0.7824136032
366	315	9.6738154848
179	6	14.487111792
6	179	14.1717413376
241	16	1.2248436384
16	241	1.2836550816
16	63	4.0367271456
63	16	5.2619995008
324	367	6.7739092128
367	324	62.9652797568
367	4	98.206737984
4	367	59.286560688
313	368	12.4385909472
368	313	195.2759816928
368	88	21.9455770176
88	368	4.5491235552
313	369	12.4383449664
369	313	194.7480141024
266	35	4.7545877664
35	266	6.6451062528
317	316	0.2037460992
316	317	0.7351518528
282	93	7.5373566336
93	282	4.4527317408
25	370	37.1919931776
370	25	73.9801716768
370	371	14.1246120384
371	370	14.9791622976
233	322	1.225203408
322	233	5.581616688
310	267	193.3185118464
267	310	56.9388660192
279	372	3.6502303968
372	279	38.5413658272
267	373	13.1896315008
373	267	152.6495572512
295	319	8.62042176
319	295	10.6946251776
79	84	-0.573644592
84	79	1.2566733984
84	9	2.257104528
9	84	4.9328722656
9	54	4.7808836064
54	9	3.4043737536
209	374	30.4750794528
374	209	29.5813371168
374	375	29.073698064
375	374	318.573040176
375	376	2.6485494048
376	375	2.331373104
148	272	5.6345212224
272	148	4.8616205184
272	377	9.48878712
377	272	161.4381767424
377	378	165.1228151616
378	377	181.0600664544
242	35	3.6819207072
35	242	5.157435888
194	260	4.038326928
260	194	4.0958244864
71	4	1.8110931264
4	71	2.7938794752
4	5	5.2266596544
5	4	4.7174065632
12	83	3.2180981184
83	12	6.1438738464
83	379	74.9223971136
379	83	7.6852932192
154	140	2.4304450464
140	154	1.3169858688
140	222	1.8587130912
222	140	5.99327424
222	380	6.4112293152
380	222	6.1999636896
380	381	5.7979063872
381	380	7.2116987904
306	232	2.3510018016
232	306	20.8801717056
232	220	71.2887378912
220	232	68.9124936384
316	317	132.8373654912
317	316	132.3059596128
317	382	2.3586375744
382	317	0.2394543648
316	341	138.4197722208
341	316	129.45535992
341	383	122.25108384
383	341	160.6177685664
238	384	28.3811929056
384	238	12.9132138816
255	385	304.385152752
385	255	213.0801246144
334	238	49.7909713824
238	334	51.217235712
17	98	4.1678862336
98	17	5.7996614304
98	204	2.6167517856
204	98	2.3386421088
359	386	107.2696493952
386	359	226.5481675008
304	387	41.0968056672
387	304	111.199883184
387	388	108.66928896
388	387	35.2679951232
335	389	75.6562521888
389	335	24.2286069888
53	390	213.6263761728
390	53	60.104353536
249	391	3.759859296
391	249	2.0747384064
391	111	2.0028840192
111	391	3.635944848
308	9	4.3489376928
9	308	125.0119803744
14	323	6.2879138784
323	14	60.1787343456
146	392	1.0075059936
392	146	15.8729658048
392	157	68.1243252768
157	392	68.3106511968
111	249	23.582264832
249	111	23.6343248928
162	393	169.7731011072
393	162	167.043803904
393	385	113.488623072
385	393	25.1025780672
353	394	27.8878842432
394	353	63.1728072
318	317	16.2407532384
317	318	117.996336576
317	395	115.8357381696
395	317	4.7453840928
395	396	4.165503408
396	395	13.8681572256
269	397	124.1517414528
397	269	-5.725541376
397	398	-0.282620016
398	397	193.4126040384
4	52	14.5407957408
52	4	14.0036364
227	399	26.405694144
399	227	41.5549911744
356	355	6.148746288
355	356	32.3866364256
357	288	-0.3048860736
288	357	10.7962870464
270	400	204.879840912
400	270	194.3753428224
323	317	10.6092910944
317	323	113.4663373152
317	396	117.7793664768
396	317	16.3916664768
257	169	240.9626804832
169	257	199.8452590848
333	238	20.8749832992
238	333	36.8784099072
115	401	87.1735172544
401	115	86.9654117952
322	234	6.9473433024
234	322	10.3038381504
234	90	4.8166933824
90	234	4.5873607392
377	402	60.8194147968
402	377	56.109344112
375	317	21.3473771136
317	375	21.0733757568
355	403	75.186990288
403	355	56.9715609888
403	404	46.8510775488
404	403	38.9341704672
354	405	1.5800824224
405	354	63.0899381088
85	16	3.5834884704
16	85	2.6361492768
73	90	3.4288593408
90	73	3.4038265824
355	406	117.8448033312
406	355	115.8199712928
335	407	4.6056423744
407	335	5.8663579968
407	238	22.0025919456
238	407	35.4989786112
371	408	30.82102488
408	371	26.412671808
349	409	19.565525376
409	349	51.0240013344
362	218	7.458288192
218	362	10.6649587008
181	410	34.730038224
410	181	31.4010292032
282	220	202.6315528128
220	282	190.9814801472
362	411	11.9702263968
411	362	27.6653895552
411	175	34.9287303168
175	411	27.9536038848
164	412	13.0062182112
412	164	25.68132216
382	317	22.4075761344
317	382	24.5267590464
317	413	13.511327472
413	317	11.1695778144
319	411	3.4970644512
411	319	4.8729066048
219	414	192.2834041632
414	219	49.9373182944
13	415	193.6027018368
415	13	1.4675162688
173	416	8.0418075264
416	173	160.4880835488
416	417	104.755383216
417	416	128.2244007168
417	418	266.5223774496
418	417	123.65517024
360	309	1.027269216
309	360	1.625777568
309	367	75.3580594368
367	309	76.5567697536
363	215	3.3078544128
215	363	17.74422288
215	419	16.155173952
419	215	12.0304727712
6	9	16.41276432
9	6	15.9098313024
333	420	-0.246709152
420	333	-0.1956517536
420	421	3.1953934944
421	420	1.6378456608
421	422	64.9173051072
422	421	14.4311461056
422	423	9.614600208
423	422	6.7679753472
197	424	45.812520432
424	197	6.253120944
424	425	134.3273782464
425	424	88.7846971968
425	426	86.82959592
426	425	99.4909977792
374	260	9.8584293888
260	374	195.9750269856
260	427	20.7154433664
427	260	21.3867311904
56	428	32.242661712
428	56	12.6358519968
364	429	4.2163392672
429	364	5.041125072
327	430	188.5591566144
430	327	25.8010134624
364	431	22.2939130464
431	364	20.4316351776
194	317	12.3990668352
317	194	115.5653078112
317	432	105.981036336
432	317	11.612958336
233	322	-0.0102239616
322	233	4.3461893952
360	367	40.9576328928
367	360	42.7548513024
367	433	38.0944804032
433	367	37.0204714656
243	268	194.3722052064
268	243	186.9843496896
394	434	58.8284345376
434	394	101.5443031968
383	286	3.9002065056
286	383	7.428770496
385	435	28.3771620864
435	385	56.9528270496
359	436	24.5056811616
436	359	177.38025408
436	437	73.0283275872
437	436	41.2189435584
373	438	1.4520925728
438	373	1.661120784
438	439	58.0595724288
439	438	56.3816961792
321	13	2.6544249504
13	321	54.0233896032
13	73	52.1927110656
73	13	51.584615424
73	56	5.6661298848
56	73	8.5359388896
366	367	-0.3644828928
367	366	0.5460003936
234	440	166.3666267968
440	234	244.5616893312
79	441	0.3715041024
441	79	0.4042203264
17	243	6.6287849472
243	17	6.8529665088
330	442	4.4401926816
442	330	20.086170048
442	443	110.2138049952
443	442	100.8010160928
363	444	10.652606784
444	363	4.570575984
444	306	1.5710959584
306	444	2.8014706656
306	445	0.0390181536
445	306	0.3045633696
174	238	51.9169572576
238	174	19.063742688
366	439	16.4977907328
439	366	16.7883780384
286	446	3.019665744
446	286	26.5552089984
341	201	37.2459777984
201	341	16.2869932224
201	447	150.2886153888
447	201	34.713209664
241	105	0.2407511232
105	241	1.4387056704
295	399	96.606021168
399	295	96.360819264
361	411	-1.9537801344
411	361	9.318990384
411	399	45.9927657792
399	411	42.2975188224
348	335	-1.2335823072
335	348	0.3774270816
335	448	2.2823265024
448	335	1.4252627808
448	449	2.671701408
449	448	3.1810900608
384	450	3.609129312
450	384	123.7059524448
387	451	20.7569073312
451	387	45.43628904
309	367	12.6096880896
367	309	13.8083984064
367	452	15.0342158592
452	367	15.1103506752
354	453	53.00803296
453	354	61.11510264
453	454	51.0173220096
454	453	122.1207072768
375	317	0.339646608
317	375	0.0656452512
385	455	12.6363582144
455	385	12.906402624
140	16	5.7317943168
16	140	9.0645132672
377	456	16.9276467168
456	377	13.8410796384
195	174	2.222778672
174	195	2.0077704576
174	238	51.6633614208
238	174	18.8101468512
361	268	6.5906296704
268	361	2.7016288992
268	457	78.1898225472
457	268	22.3857317952
457	458	118.553623056
458	457	172.85439528
358	459	0.1392347904
459	358	1.3168860768
459	460	21.0671754336
460	459	79.4746888704
460	461	10.4018170464
461	460	8.6722143264
249	462	194.8651121088
462	249	3.615850368
459	24	22.4533702944
24	459	92.4817048992
24	34	1.9401568416
34	24	0.442534752
222	463	4.3325839872
463	222	1.9501946208
463	8	2.7247767552
8	463	1.2706227648
389	464	5.8748524992
464	389	3.6983171808
326	192	177.3254363904
192	326	218.2595943168
371	465	14.2280377632
465	371	18.6748333056
465	316	20.4239900736
316	465	121.5893716416
316	317	5.3863221888
317	316	4.8549163104
399	466	14.0491892448
466	399	14.4621575712
287	467	34.1984529792
467	287	114.6876275808
336	407	20.7419984064
407	336	20.6521913088
407	468	31.6119052512
468	407	31.5082050336
468	270	3.0564464832
270	468	1.1545576704
210	45	-0.0431650368
45	210	15.130964592
372	469	3.3360289344
469	372	142.10266104
152	54	30.381884352
54	152	33.2052387552
40	157	9.7745833728
157	40	9.2768320224
79	470	21.4661205216
470	79	20.3285954016
179	471	8.5815440928
471	179	7.2958887648
386	472	18.0181495872
472	386	57.6434047968
472	473	155.7114992928
473	472	69.0733334592
242	474	34.6700977056
474	242	72.4163908608
41	475	42.1820501472
475	41	80.4394797408
475	476	69.3808413408
476	475	30.5603508096
367	477	12.5685517536
477	367	3.5806735584
477	478	4.392051984
478	477	14.9756905728
478	479	19.2706415712
479	478	18.3613068
479	371	19.090405296
371	479	15.4564448832
197	480	21.577833648
480	197	7.427217888
146	102	1.3364872992
102	146	17.1978977088
102	481	52.5238867584
481	102	39.8959406208
172	482	21.1380039072
482	172	117.317582496
482	483	87.2386088544
483	482	20.7848374272
285	484	3.5461545984
484	285	19.1948232384
484	286	14.1621369408
286	484	-0.3566301696
295	485	44.5478271264
485	295	18.1698541632
386	486	32.0816681856
486	386	28.8724766976
486	386	1.5202963872
386	486	4.7294881344
227	487	32.8254783552
487	227	28.8939633408
292	488	72.9537889248
488	292	73.7046114912
488	489	26.6497700832
489	488	9.472575456
366	490	4.52966904
490	366	3.2602606272
303	217	12.5050980384
217	303	161.518398624
217	226	27.5390865792
226	217	37.2288192768
301	491	57.2447479392
491	301	31.5799720704
73	492	196.9573859136
492	73	5.1099289344
392	493	0.102630864
493	392	0.8772045984
8	494	1.6118561952
494	8	3.0758673024
360	260	2.9888030592
260	360	3.8105144928
9	495	1.90576152
495	9	1.6444915488
495	9	1.1680534368
9	495	1.429323408
96	322	-0.4935183552
322	96	3.5817375744
322	496	4.9329775008
496	322	0.2864040768
496	322	0.1736659488
322	496	4.8202394976
288	497	6.4022068224
497	288	16.2471839904
154	57	2.7432559008
57	154	3.013177968
427	209	198.253426608
209	427	12.3592837824
364	498	1.7501787936
498	364	1.4258426112
498	429	6.1649045568
429	498	7.3140268032
346	499	13.1404104576
499	346	13.1050112544
204	500	0.4668655968
500	204	0.1704387744
500	204	1.769676336
204	500	2.0661031584
204	350	1.8914694912
350	204	0.011907648
350	157	2.8954845792
157	350	2.1366993888
433	439	7.0522949376
439	433	7.5064078944
390	501	108.9988210656
501	390	332.8500714048
382	502	0.5590861056
502	382	2.5401268224
436	446	-0.4730980608
446	436	30.8200847616
370	503	-0.0044628
503	370	0.07700832
503	479	10.5448578624
479	503	14.951897568
479	317	22.5627713568
317	479	124.009582176
398	504	7.6369544928
504	398	6.9917582592
406	505	29.231362944
505	406	134.3914781472
505	506	44.264476944
506	505	43.60536504
210	170	190.455757488
170	210	48.2050826208
395	507	2.6806116672
507	395	-0.1731863424
54	508	13.6147594176
508	54	14.8135905216
508	9	5.1336358848
9	508	5.3113146336
29	509	21.8817549792
509	29	21.978256176
266	22	20.7827664192
22	266	25.745773536
432	510	175.3794249984
510	432	-0.211714848
317	229	44.1781446816
229	317	50.2659175392
229	278	83.5556287968
278	229	83.6391961728
278	383	92.4642011232
383	278	116.2265391936
152	181	4.3157803104
181	152	5.8583510496
320	511	11.962848528
511	320	9.7381960992
115	9	5.7593511648
9	115	5.7016345824
183	512	52.6836192768
512	183	53.3803211424
512	513	48.5152892928
513	512	50.4790641792
140	66	2.0303540352
66	140	6.0252483744
66	141	6.3437909184
141	66	5.41963224
79	514	114.4556617248
514	79	114.578791056
233	13	-0.8391501504
13	233	7.2775542528
13	90	1.9710078624
90	13	1.3378792032
179	515	9.2886673536
515	179	9.2119547808
442	516	162.257977872
516	442	58.0501588032
164	229	10.6180751232
229	164	13.9656436416
229	517	15.0807010464
517	229	14.8290370272
517	518	13.1884982784
518	517	22.5636280128
366	490	7.1217667584
490	366	5.8523583456
439	143	144.122951376
143	439	9.7066206144
431	519	0.2047168704
519	431	1.1298286944
393	520	5.0791629312
520	393	3.1346914464
379	6	2.0250217728
6	379	123.45894288
357	521	10.0529400672
521	357	6.9707482848
413	317	0.3336437952
317	413	2.6753934528
346	148	192.988875024
148	346	36.5474374272
364	522	75.5536535712
522	364	87.9182221824
444	306	-0.7407173952
306	444	0.4896570528
6	523	1.7623679328
523	6	1.3225817376
523	115	1.8323498592
115	523	1.8269196192
115	9	0.2760355584
9	115	0.218318976
451	524	2.0823588864
524	451	2.5515036288
456	525	115.5676102848
525	456	113.1113165184
383	472	0.9120384864
472	383	2.712163824
472	526	33.185372112
526	472	40.1433335424
526	527	34.190764848
527	526	31.523938992
527	526	30.0388178592
526	527	32.7056437152
389	528	89.6504104224
528	389	246.4881627456
460	529	51.2247864672
529	460	35.7814511424
336	407	11.4069723552
407	336	11.3171655168
415	530	-6.156121824
530	415	146.118616416
530	531	124.2969517728
531	530	73.5176186496
222	532	2.0701969632
532	222	0.3197390112
532	140	5.4479752416
140	532	3.063872304
416	533	19.836674496
533	416	29.5489384128
466	208	22.3997182272
208	466	13.426260624
71	4	1.1782475136
4	71	2.1610338624
97	257	4.1001440544
257	97	0.820006416
257	534	0.1015245888
534	257	2.1808341504
115	535	24.2984950848
535	115	24.0848113824
241	63	9.7621218144
63	241	11.0462056128
16	52	3.1293965088
52	16	2.2915203264
52	4	0.2015445312
4	52	0.7387036704
457	536	124.8425535168
536	457	90.7447051296
438	537	25.4456378208
537	438	126.6169846176
537	267	245.827901808
267	537	4.9876005312
146	157	1.127715696
157	146	16.1795016864
252	538	199.5647681376
538	252	192.6117004032
382	539	41.5724324832
539	382	43.4734900416
472	527	6.3750289248
527	472	10.6661647584
218	540	7.7518106784
540	218	7.9746775776
540	541	85.7011534272
541	540	205.054462656
387	542	95.3900657568
542	387	12.222839088
347	543	2.4889734432
543	347	2.63721744
446	544	0.5873974848
544	446	9.3049549632
395	315	6.5442849696
315	395	5.699517696
437	436	16.4573923392
436	437	48.266776368
227	485	61.1793593568
485	227	50.195885328
300	25	3.6668217888
25	300	7.268005584
16	545	1.3358527776
545	16	0.5773807008
284	546	19.2280822272
546	284	35.5568346432
546	446	13.1722269984
446	546	6.534481248
29	180	-0.4831288416
180	29	-0.5321251584
331	482	21.8357425728
482	331	116.6084102592
360	267	189.0557692992
267	360	52.2420137568
111	391	73.8550091808
391	111	72.221948352
381	208	197.3566404864
208	381	190.6102145088
393	520	25.0476535872
520	393	23.1031821024
475	209	199.0527947424
209	475	13.4988433632
154	140	1.2541640832
140	154	0.1407049536
140	63	2.223328176
63	140	6.7813197408
411	175	19.2682615968
175	411	12.2931349056
175	547	202.858399728
547	175	31.2378539904
547	458	0.633397968
458	547	162.56398032
465	479	17.4627143136
479	465	16.649879184
428	548	1.3014141696
548	428	69.63174072
548	9	66.022713792
9	548	118.9439111232
9	212	232.1348989824
212	9	16.5395763648
485	487	-0.1330449024
487	485	6.9189139872
285	527	10.749171744
527	285	14.4417701952
54	9	1.0421934336
9	54	2.4187032864
388	549	48.758437296
549	388	150.2102615616
350	254	10.9126447776
254	350	9.6023073888
481	550	7.7504120352
550	481	4.1658613632
445	306	23.603168016
306	445	23.3376228
48	551	18.1005920352
551	48	65.8866008736
551	219	77.1550339392
219	551	62.389798992
219	384	59.931214416
384	219	8.0808720768
9	552	60.107435424
552	9	64.5102550944
322	233	2.9075456736
233	322	-1.4488676064
29	553	33.6713648544
553	29	33.6773521152
420	554	3.818227248
554	420	3.781693008
140	555	0.994409136
555	140	5.71859352
179	556	16.4513584224
556	179	16.4219407776
366	316	17.6448515616
316	366	121.219977168
316	164	47.1722128704
164	316	49.3810113312
407	195	109.0287620352
195	407	155.5933709664
399	557	0.5124080736
557	399	0.7234287552
557	296	9.3120855552
296	557	4.7940732576
296	558	60.2013951648
558	296	115.5506518656
558	559	113.3644289472
559	558	110.7703423872
403	273	22.8739355136
273	403	64.7467613568
499	50	4.0091718528
50	499	4.1214839904
50	560	4.7368066464
560	50	4.6394754912
484	286	12.8043861696
286	484	-1.7143809408
96	322	-1.2172729248
322	96	2.8579827456
181	561	1.0276121376
561	181	-1.3958407296
561	562	48.2559928704
562	561	49.0268471904
562	561	3.8016415584
561	562	3.0307869792
561	563	0.8454230496
563	561	0.6044987232
392	564	198.57427344
564	392	204.2958718656
564	565	168.945784992
565	564	7.1319717216
424	566	-0.583218144
566	424	-0.5874044832
566	567	167.0205041568
567	566	245.1307269024
434	568	1.1030020128
568	434	1.3581538272
416	533	0.7601314752
533	416	10.4723951328
533	569	25.3726281792
569	533	-1.236939984
506	570	45.7486258176
570	506	44.6262696
32	571	1.8415830816
571	32	0.5861800224
571	572	11.6747666496
572	571	15.7909660704
572	120	29.003704992
120	572	28.8291138336
204	52	10.1654621568
52	204	8.4583382976
52	4	7.0427110176
4	52	7.5798700992
233	573	165.2911671168
573	233	144.167476752
573	574	143.5325977152
574	573	182.304320544
503	366	0.1089715392
366	503	2.919102624
241	85	1.1544607296
85	241	2.1606116256
472	527	0.1365000768
527	472	4.4276357376
469	575	46.683712368
575	469	33.5206379808
334	23	3.0390012864
23	334	5.0214665664
435	576	72.261179568
576	435	25.1335299168
576	577	21.798660384
577	576	82.9248052032
412	578	4.2029938368
578	412	1.6786896192
492	579	83.680974288
579	492	317.058115968
289	290	1.912387968
290	289	13.0532020992
482	580	105.6187185408
580	482	162.514825632
486	581	9.4046355072
581	486	23.5313102592
518	412	15.2611851168
412	518	15.465254832
451	582	1.6664673024
582	451	-0.0503667264
582	524	2.7400076064
524	582	4.9259863584
462	583	75.2517050112
583	462	27.1948542048
395	584	8.972800272
584	395	21.3871282848
584	585	71.9824509216
585	584	22.2177963744
228	586	15.2788832928
586	228	56.2585735872
288	587	18.2633076864
587	288	14.1804748224
320	588	0.2968537248
588	320	0.5799931776
477	316	0.3096504288
316	477	111.962170944
316	164	38.597240016
164	316	40.806038736
266	183	2.7563662368
183	266	4.2470171424
183	589	4.5915499296
589	183	7.8179349312
589	590	7.0550606016
590	589	6.0585055488
490	591	19.6180825824
591	490	23.4588905568
591	592	63.5121982368
592	591	147.222851184
84	181	18.797492448
181	84	18.8159666688
493	35	5.5904118624
35	493	5.302779696
489	593	9.1970728128
593	489	22.2618562272
511	594	13.641178896
594	511	8.0071314912
443	595	21.3148770624
595	443	78.9177784896
336	407	3.5506618272
407	336	3.4608549888
140	596	178.2616758624
596	140	104.0783535936
534	597	179.0361957888
597	534	223.6680257472
254	208	194.5459000512
208	254	192.1244946048
534	598	178.9746661152
598	534	176.2529043744
452	599	195.243416064
599	452	10.6322300352
414	600	4.5173352672
600	414	1.2199763808
600	212	1.1511885888
212	600	-0.2284942368
212	601	0.7502616576
601	212	4.5887267232
382	376	7.0345850976
376	382	9.1105928064
393	520	5.9709345696
520	393	4.0264630848
8	225	190.3125580416
225	8	37.091193408
4	602	71.1556368768
602	4	69.6130233696
602	50	68.1906530016
50	602	68.147333424
498	603	8.392527936
603	498	76.9580167968
40	604	195.291854064
604	40	188.755593408
143	605	2.8758040416
605	143	240.0181245792
605	229	52.3995697728
229	605	58.5144850176
484	606	13.0771031904
606	484	1.4657614848
507	317	-0.0079607232
317	507	113.9361912288
317	316	336.1063123584
316	317	336.6377182368
375	317	94.5677322432
317	375	94.2937308864
383	284	-1.0416752928
284	383	16.3314255456
284	607	16.7429459808
607	284	1.508253696
227	608	79.1209741824
608	227	87.5468018016
608	609	94.0040992512
609	608	205.9422503904
174	610	7.2122389632
610	174	65.3972198688
478	611	205.447405968
611	478	3.7540210752
519	429	5.6608504992
429	519	7.4228026752
6	612	110.5458096096
612	6	56.8724004
300	104	76.8612592512
104	300	30.4548221952
461	613	159.4988057952
613	461	198.5975705952
446	614	25.784514864
614	446	-1.3123262304
614	615	1.7274650976
615	614	1.0090995552
71	53	67.2502116384
53	71	16.3682503488
459	616	38.84175504
616	459	40.0239224352
146	17	6.4293388416
17	146	22.7658066048
309	433	31.504053168
433	309	31.6287545472
433	439	7.8487932096
439	433	8.3029064256
179	617	9.6100053696
617	179	9.6479315136
222	218	192.8767873536
218	222	187.100132256
496	233	0.2596909248
233	496	0.5498508096
233	618	182.653789536
618	233	235.4836642272
240	545	3.3555492864
545	240	0.1758324576
545	140	6.4968529248
140	545	3.922605792
445	619	2.179812384
619	445	4.8941130528
413	382	0.2757151872
382	413	0.4982816736
382	620	33.720193728
620	382	35.86656024
620	432	106.5189263616
432	620	12.1236647616
328	412	8.6737272768
412	328	60.1585009344
429	621	9.740194272
621	429	62.3791448352
621	622	125.8354178208
622	621	133.3860506784
96	623	19.8756975744
623	96	8.8157331072
382	317	5.1400399392
317	382	7.2592231104
377	624	11.5893602496
624	377	14.3335236096
483	625	3.6671113152
625	483	50.191673328
625	626	170.035171488
626	625	162.616317984
402	627	0.6456521664
627	402	2.9077245216
627	628	127.0214231904
628	627	382.0740513408
505	629	-5.2352238816
629	505	11.3519084256
484	286	16.4735265024
286	484	1.954759392
526	630	14.1046995168
630	526	21.975207984
630	446	19.094533056
446	630	29.5300453248
84	631	10.2369370752
631	84	8.36696952
266	35	8.0317355328
35	266	9.9222542784
272	173	0.5000986656
173	272	1.628956656
173	632	64.8223798464
632	173	9.7243680384
351	633	44.856563616
633	351	30.1075893216
419	634	34.2844407648
634	419	35.9237327616
465	591	214.1329084416
591	465	214.294564224
591	316	221.4809319168
316	591	322.4846577024
468	577	205.284305664
577	468	204.3437183712
472	606	2.2186978272
606	472	6.854562144
511	635	37.349487504
635	511	78.974035776
268	411	181.018096272
411	268	196.1798675616
164	328	55.0073330208
328	164	16.197663312
152	84	1.0622381472
84	152	2.5863346656
84	9	0.8100279936
9	84	3.485795472
9	636	4.9722488928
636	9	5.1731905824
488	637	9.89998848
637	488	3.5933056704
85	63	6.3883937952
63	85	6.6663266976
240	157	6.7164075072
157	240	2.5260631488
444	596	-1.8631290816
596	444	1.2207213216
414	638	5.2377365664
638	414	2.616289632
638	639	4.267778544
639	638	5.9806048032
54	32	6.6348880704
[truncated: 6,559 more rows]
